# Supplementary material for: De facto directors and corporate directorships
Source: Royal Society of Chemistry journal article supplement (doi:10.1039/c9tb02797a), 2012-01-01
Supplement: c9tb02797a1.pdf [file c9tb02797a1.pdf]

## Electronic Supplementary Information

### FRET-Based Supramolecular Nanoprobe with Switch on Red Fluorescence to Detect SO<sub>2</sub> Derivatives in Living Cells

Lu Jia, Li-Ya Niu,\* Ling-Yun Wang, Xinxin Wang and Qing-Zheng Yang\*

Key Laboratory of Radiopharmaceuticals, Ministry of Education, College of Chemistry, Beijing  
Normal University, Beijing 100875, P. R. China

\*E-mail: qzyang@bnu.edu.cn. \*E-mail: niuly@bnu.edu.cn.

### Contents

|                                                      |    |
|------------------------------------------------------|----|
| 1. Previous work to detect sulfite.....              | 2  |
| 2. Experimental Section.....                         | 8  |
| 2.1 Synthesis of Acceptor HEM-CO-Ph.....             | 8  |
| 3. Spectra Response.....                             | 8  |
| 4. Mechanism: .....                                  | 11 |
| 5. Cell Viability and Cellular Imaging.....          | 13 |
| 5.1 Exogenous Imaging of Nanoprobe and Sulfite.....  | 13 |
| 5.2 Endogenous Imaging of Nanoprobe and Sulfite..... | 14 |
| 5.3 Subcellular Localization of the Nanoprobe.....   | 14 |
| 6. Appendix Information.....                         | 15 |
| Reference.....                                       | 16 |

## 1. Previous work to detect sulfite

| number | Probe Structure                                                                     | Detection Medium                                                                                                    | type                                                                                                                    | year              |
|--------|-------------------------------------------------------------------------------------|---------------------------------------------------------------------------------------------------------------------|-------------------------------------------------------------------------------------------------------------------------|-------------------|
| 1      | 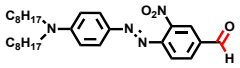   | within the polymer layer in contact with plain citrate buffer and buffered solutions of bisulfite, all at pH = 4.9. | Absorption blue-shift from 524 nm to 484 nm                                                                             | 2002 <sup>1</sup> |
| 2      |    | 90% water/DMSO solution (pH = 7.2, 10 mM Tris-HCl buffer)                                                           | Ratiometric (Absorption blue-shift from 348nm, 366nm, 386nm to 290nm and fluorescence blue-shift from 417 nm to 353 nm) | 2009 <sup>2</sup> |
| 3      |    | CH <sub>3</sub> CN-H <sub>2</sub> O (98:2, v/v) HEPES buffer (pH = 7.0, 10 mM)                                      | Turn-on (absorption red-shift from 359nm to 571 nm and fluorescence at 588 nm)                                          | 2010 <sup>3</sup> |
| 4      |  | DMSO-acetate buffer (0.1 M, pH = 5.0, 1 : 1, v/v)                                                                   | Turn-on (absorption at 425 nm and fluorescence at 535 nm)                                                               | 2012 <sup>4</sup> |
| 5      |  | 20% DMF buffer solution. (pH = 7.4)                                                                                 | Ratiometric (Absorption blue-shift from 529nm to 411nm and 368 nm and fluorescence blue-shift from 578 nm to 480 nm)    | 2013 <sup>5</sup> |
| 6      |  | PBS (20 mM, pH = 7.4) containing 1 mM CTAB.                                                                         | Ratiometric (Absorption blue-shift from 470nm to 390nm and fluorescence blue-shift from 592 nm to 465 nm)               | 2013 <sup>6</sup> |
| 7      |  | PBS buffer (pH = 7.4, 10 mM, containing 30% DMF)                                                                    | Ratiometric (Absorption blue-shift from 545nm to 463nm to 410nm and fluorescence blue-shift from 633 nm to 478 nm)      | 2013 <sup>7</sup> |

|    |                                                                                     |                                                                                                   |                                                                                                                                    |                    |
|----|-------------------------------------------------------------------------------------|---------------------------------------------------------------------------------------------------|------------------------------------------------------------------------------------------------------------------------------------|--------------------|
| 8  | 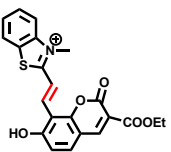   | MeOH buffer<br>(Na <sub>2</sub> HPO <sub>4</sub> /<br>citric acid, pH = 7.4,<br>30.0 mM, 1:1 v/v) | Ratiometric<br>(Absorption blue-shift from<br>500 nm to 400 nm and<br>fluorescence blue-shift from<br>600 nm to 460 nm)            | 2014 <sup>8</sup>  |
| 9  |    | PBS                                                                                               | Turn-on<br>(absorption blue-shift from<br>392nm to 234 nm, 278 nm<br>and fluorescence at 450 nm<br>increase)                       | 2014 <sup>9</sup>  |
| 10 |    | HEPES buffer (20 mM<br>pH = 7.4)                                                                  | Ratiometric<br>(Absorption blue-shift from<br>570nm to 473nm and<br>330nm and fluorescence<br>blue-shift from 663 nm to<br>523 nm) | 2014 <sup>10</sup> |
| 11 |    | PBS buffer (pH = 7.4,<br>10mM, containing<br>30% DMSO)                                            | Ratiometric<br>(Absorption blue-shift from<br>500nm to 400nm and<br>fluorescence blue-shift from<br>575 nm to 477 nm)              | 2014 <sup>11</sup> |
| 12 |  | PBS buffer (pH = 7.4,<br>10 mM)                                                                   | Ratiometric<br>(absorption at 310nm and<br>360nm decrease and<br>fluorescence blue-shift from<br>571 nm to 465 nm)                 | 2014 <sup>12</sup> |
| 13 |  | PBS (pH = 7.4,<br>containing 30%<br>EtOH)                                                         | Ratiometric<br>(Absorption blue-shift from<br>570 nm to 420 nm and<br>fluorescence blue-shift from<br>650 nm to 480 nm)            | 2015 <sup>13</sup> |
| 14 |  | glycerol/PBS = 4/6,<br>pH=7.40                                                                    | Ratiometric<br>(Absorption blue-shift from<br>499nm to 322nm and<br>fluorescence blue-shift from<br>592 nm to 465 nm)              | 2015 <sup>14</sup> |
| 15 |  | pH = 7.4 (10mM,<br>containing 30%<br>DMF)                                                         | Ratiometric<br>(absorption blue-shift from<br>487nm to 290nm and<br>fluorescence blue-shift from<br>590 nm to 490 nm)              | 2015 <sup>15</sup> |

|    |                                                                                     |                                                         |                                                                                                             |                    |
|----|-------------------------------------------------------------------------------------|---------------------------------------------------------|-------------------------------------------------------------------------------------------------------------|--------------------|
| 16 | 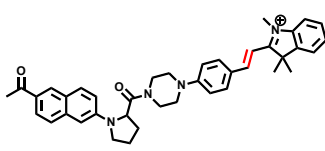   | aqueous buffer (10 mM PBS, pH = 7.4) containing 10% DMF | Turn-on (absorption at 514 nm decrease and fluorescence at 500 nm increase)                                 | 2016 <sup>16</sup> |
| 17 |    | PBS buffer solution (pH = 7.0)                          | Ratiometric (Absorption 520nm and 390nm decrease and fluorescence blue-shift from 590 nm to 450 nm)         | 2016 <sup>17</sup> |
| 18 |    | EtOH/PBS solution (v/v = 1/9, pH = 7.4)                 | Ratiometric (Absorption blue-shift from 500nm to 290nm and fluorescence blue-shift from 600 nm to 450 nm)   | 2016 <sup>18</sup> |
| 19 |    | PBS solution (pH = 7.4, containing 20% EtOH)            | Ratiometric (Absorption 510nm and 380 nm decrease and fluorescence blue-shift from 590 nm to 500 nm)        | 2016 <sup>19</sup> |
| 20 |  | PBS buffer (pH = 7.4, 10 mM)                            | Ratiometric (absorption blue-shift from 506nm to 266 nm, 320nm and fluorescence blue-shift to 470 nm)       | 2016 <sup>20</sup> |
| 21 |  | PBS (10mM, pH = 7.4, containing 30% DMF)                | Ratiometric (absorption at 508nm decrease and fluorescence blue-shift from 582 nm to 530 nm)                | 2016 <sup>21</sup> |
| 22 |  | PBS buffer (20 mM, pH = 7.4, containing 20% DMF)        | Turn on (Absorption blue-shift from 482nm to 420 nm and fluorescence at 469 nm\554 nm)                      | 2016 <sup>22</sup> |
| 23 |  | PBS buffer (10 mM, pH = 7.4, containing 25 μM CTAB)     | Ratiometric (Absorption blue-shift from 443 nm to 325 nm and fluorescence blue-shift from 580 nm to 467 nm) | 2016 <sup>23</sup> |

|    |                                                                                     |                                                           |                                                                                                                  |                    |
|----|-------------------------------------------------------------------------------------|-----------------------------------------------------------|------------------------------------------------------------------------------------------------------------------|--------------------|
| 24 | 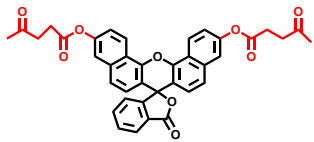   | DMSO-PBS buffer<br>(20 mM, pH = 7.0, 1:1, v/v)            | Turn-on<br>(fluorescence at 695 nm)                                                                              | 2016 <sup>24</sup> |
| 25 |    | PBS (20 mM, pH = 7.4 with 10% DMSO v/v)                   | Turn off<br>(absorption blue-shift from 595nm to 375 nm and fluorescence turn off)                               | 2016 <sup>25</sup> |
| 26 |    | PBS buffer (10 mM, pH = 7.4, containing CTAB 1 mM)        | Ratiometric<br>(Absorption blue-shift from 628nm to 338nm and fluorescence blue-shift from 665 nm to 465 nm)     | 2017 <sup>26</sup> |
| 27 |    | PBS/DMSO (1/1, v/v, pH = 7.4)                             | Turn-on<br>(fluorescence at 576 nm)                                                                              | 2017 <sup>27</sup> |
| 28 |   | PBS buffer (DMSO:H <sub>2</sub> O = 3:7, 50 mM, pH = 7.4) | Ratiometric<br>(Absorption blue-shift from 550nm to 323nm and fluorescence blue-shift from 611 nm to 467 nm)     | 2017 <sup>28</sup> |
| 29 |  | PBS buffer (10% DMSO v/v, pH = 7.4, 20 mM)                | Ratiometric<br>(absorption blue-shift from 425nm to 350nm and fluorescence blue-shift from 600 nm to 425 nm)     | 2017 <sup>29</sup> |
| 30 |  | PBS: DMSO = 7:3, v/v, pH = 7.4                            | Ratiometric<br>(Absorption blue-shift from 520 nm to 480 nm and fluorescence blue-shift from 720 nm to 545 nm)   | 2017 <sup>30</sup> |
| 31 |  | PBS solution (50 mM, pH = 7.4)                            | Ratiometric<br>(Absorption blue-shift from 475nm to 322nm and fluorescence blue-shift from 593 nm to 467 nm)     | 2017 <sup>31</sup> |
| 32 |  | Tris buffer solution (pH = 7.4, containing 70% DMSO v/v)  | Ratiometric<br>(Absorption blue-shift from 510nm to 300-375nm and fluorescence blue-shift from 560 nm to 510 nm) | 2017 <sup>32</sup> |

|    |                                                                                     |                                                                       |                                                                                                                               |                    |
|----|-------------------------------------------------------------------------------------|-----------------------------------------------------------------------|-------------------------------------------------------------------------------------------------------------------------------|--------------------|
| 33 | 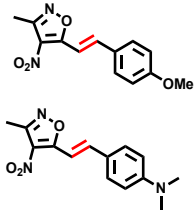   | Britton-Robinson buffer solution (20 mM, pH = 7, 1% DMSO)             | Turn-off                                                                                                                      | 2017 <sup>33</sup> |
| 34 |    | PBS buffer (10 mM, pH = 7.4, with 10% DMF, v/v)                       | Ratiometric<br>(Absorption blue-shift from 632nm to 454nm and fluorescence blue-shift from 717nm to 560 nm)                   | 2017 <sup>34</sup> |
| 35 |    | CH <sub>3</sub> CN/H <sub>2</sub> O (1/1, v/v, HEPES 10 mM, pH = 7.4) | Ratiometric<br>(absorption at 373nm and 575nm decrease and fluorescence blue-shift from 695nm to 508 nm)                      | 2017 <sup>35</sup> |
| 36 |   | PBS buffer (pH = 7.4, 0.01 M, containing 40% DMF)                     | Ratiometric<br>(absorption at 560nm decrease and fluorescence blue-shift from 589 nm to 476 nm)                               | 2017 <sup>36</sup> |
| 37 |  | phosphate buffer solution (1%DMSO, pH = 7.4)                          | Ratiometric<br>(Absorption blue-shift from 330-570nm to 250-280 nm and fluorescence blue-shift from 550-680 nm to 450-550 nm) | 2018 <sup>37</sup> |
| 38 |  | PBS (pH = 7.4, 10 mM, containing 40% EtOH)                            | Ratiometric<br>(Absorption blue-shift from 560nm to 335nm and fluorescence blue-shift from 641nm to 530 nm)                   | 2018 <sup>38</sup> |
| 39 |  | EtOH/PBS (v/v = 1/4, pH = 7.4)                                        | Ratiometric<br>(Absorption blue-shift from 455 nm to 280 nm and fluorescence 552 nm decrease, 460 nm increase)                | 2018 <sup>39</sup> |
| 40 |  | PBS solution (0.01 M, pH = 7.4, 50% DMSO)                             | Ratiometric<br>(Absorption 475nm decrease and fluorescence blue-shift from 600 nm to 483 nm)                                  | 2018 <sup>40</sup> |

|                   |                                                                                     |                                                   |                                                                                                                    |                    |
|-------------------|-------------------------------------------------------------------------------------|---------------------------------------------------|--------------------------------------------------------------------------------------------------------------------|--------------------|
| 41                | 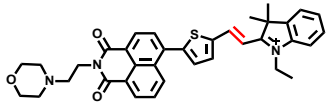   | PBS solution (10 mM, 5% DMSO, pH = 5.5)           | Turn-on<br>(absorption at 475 nm decrease and fluorescence at 524 nm increase)                                     | 2019 <sup>41</sup> |
| 42                |    | HEPES buffer (10 mM, 20% CH <sub>3</sub> CN)      | Ratiometric<br>(absorption blue-shift from 570 nm to 270 nm and fluorescence from 635 nm blue-shift to 425 nm)     | 2019 <sup>42</sup> |
| 43                |    | PBS buffer (pH = 5.0, containing 30% EtOH)        | Ratiometric<br>(Absorption blue-shift from 613 nm to 426 nm and fluorescence blue-shift from 704 nm to 512 nm)     | 2019 <sup>43</sup> |
| 44                |   | PBS buffer.                                       | Ratiometric<br>(absorption blue-shift from 590 nm to 400-500 nm and fluorescence blue-shift from 645 nm to 540 nm) | 2019 <sup>44</sup> |
| 45                |  | HEPES buffer (10 mM, pH = 7.4, with 10% DMF, v/v) | Ratiometric<br>(Absorption blue-shift from 544 nm to 424 nm and fluorescence blue-shift from 749 nm to 490 nm)     | 2019 <sup>45</sup> |
| 46                |  | EtOH-PBS buffer (10 mM, pH = 7.4, v/v, 4:6)       | Dual-emission<br>(the absorption blue-shift from 493 nm to 319 nm and fluorescence at 450 nm and 605 nm increase)  | 2019 <sup>46</sup> |
| 47<br>(This work) |  | PBS (pH = 7.4)<br>No organic solvent              | Turn-on<br>(absorption blue-shift from 590 nm to 390 nm and fluorescence at 615 nm is turned on)                   |                    |

The reaction sites to sulfite are labeled by the red line.

**Table S1.** Comparison of Fluorescent Probes for SO<sub>2</sub> Derivatives

## 2. Experimental Section.

### 2.1 Synthesis of Acceptor HEM-CO-Ph.

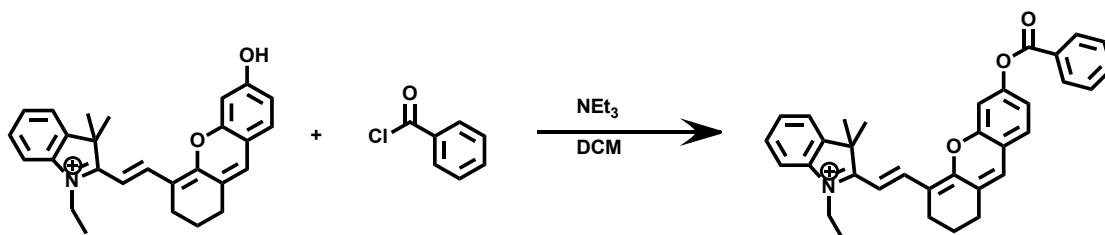

Scheme S1: The synthesis of acceptor of HEM-CO-Ph.

## 3. Spectra Response.

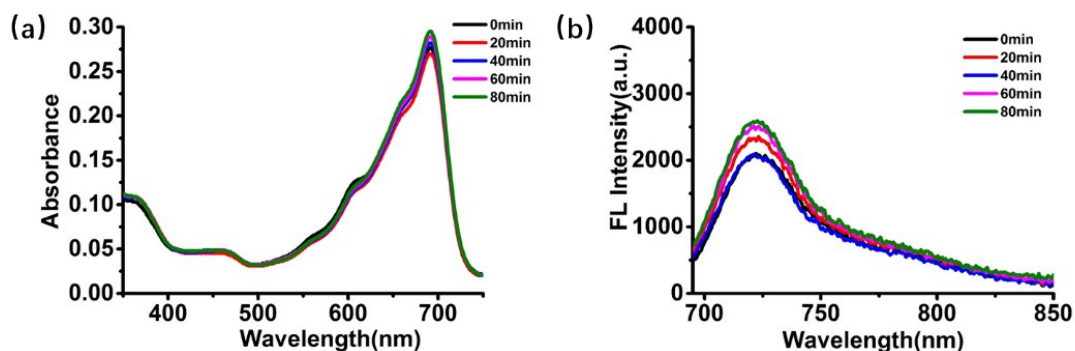

Fig. S1. (a) The absorption spectra of hemicyanine-OH (5 μM) reacted with Na<sub>2</sub>SO<sub>3</sub> (250 μM) in PBS (10 mM PBS, PH = 7.4, containing 50 % acetonitrile, 37°C). (b) The emission spectra of hemicyanine-OH (5 μM) reacted with Na<sub>2</sub>SO<sub>3</sub> (250 μM) in PBS (10 mM PBS, PH = 7.4, containing 50 % acetonitrile, 37°C).

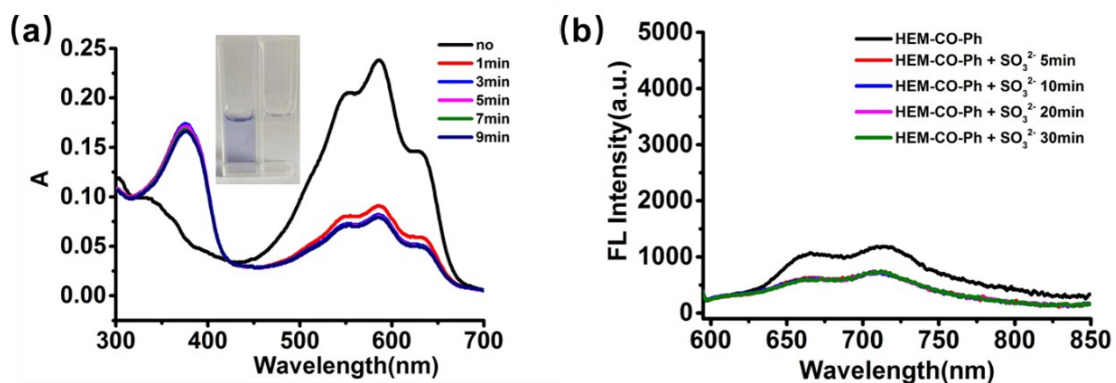

Fig. S2. (a) The absorption spectra of HEM-CO-Ph (5 μM) react with Na<sub>2</sub>SO<sub>3</sub> (100 μM) in PBS (10 mM PBS, PH = 7.4, containing 20 % acetonitrile, 37°C). Inset: the color change of HEM-CO-Ph before and after the addition Na<sub>2</sub>SO<sub>3</sub> under day light. (b) The emission spectra of HEM-CO-Ph (5 μM) react with Na<sub>2</sub>SO<sub>3</sub> (250 μM) in PBS (10 mM PBS, PH = 7.4, containing 20 % acetonitrile, 37°C). (Ex = 580 nm slit: 5 nm/10 nm).



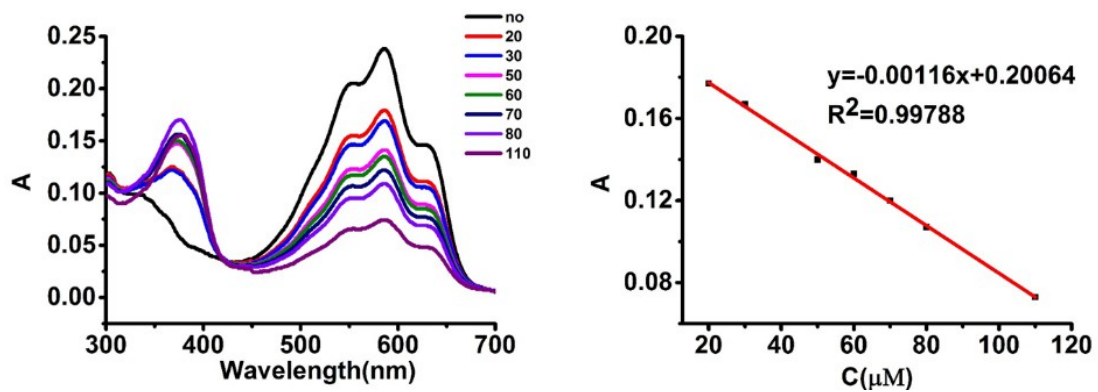

**Fig. S3.** The absorption spectra of HEM-CO-Ph (5 μM) upon addition of different concentrations of Na<sub>2</sub>SO<sub>3</sub> (0-110 μM) in PBS (10 mM PBS, PH = 7.4, containing 20 % acetonitrile, 37 °C) and the liner relationship between absorption intensity and different concentration of Na<sub>2</sub>SO<sub>3</sub>.

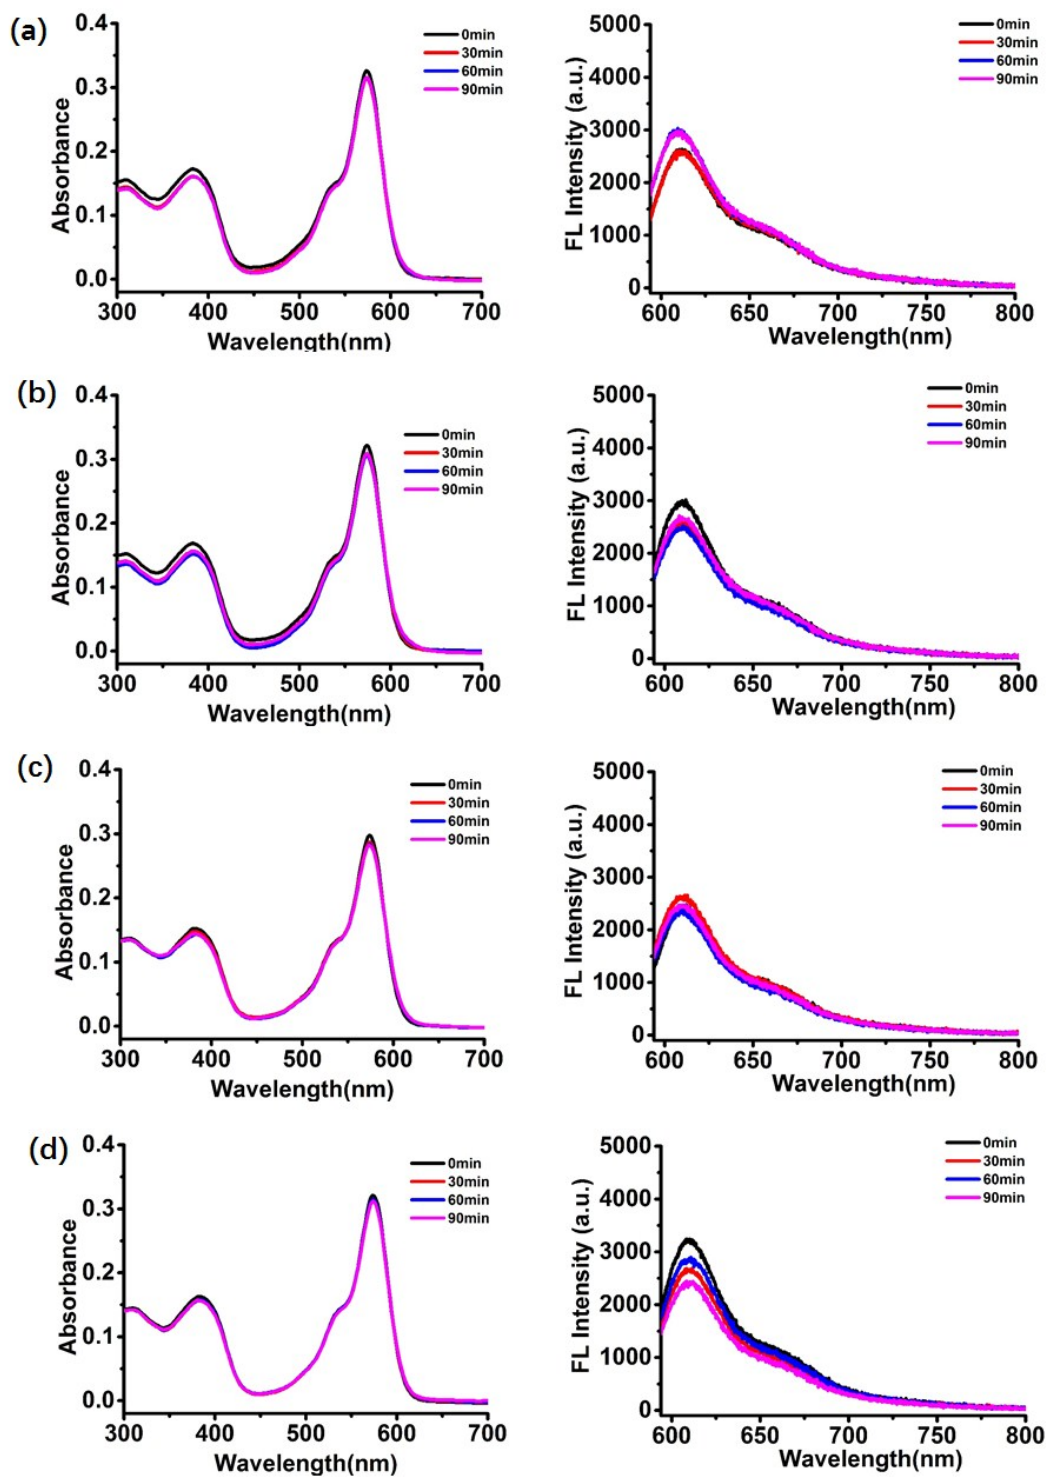

**Fig. S4.** Time-dependent absorption (left) and emission (right) spectra of BDP (5  $\mu\text{M}$ ) in the presence of (a) GSH (500  $\mu\text{M}$ ), (b) Hcy (500  $\mu\text{M}$ ), (c) Cys (500  $\mu\text{M}$ ) and (d)  $\text{Na}_2\text{SO}_3$  (250  $\mu\text{M}$ ) in PBS (10 mM PBS, PH = 7.4, containing 50% acetonitrile, 37  $^\circ\text{C}$ ) (Ex = 580 nm slit: 2.5 nm/2.5 nm).

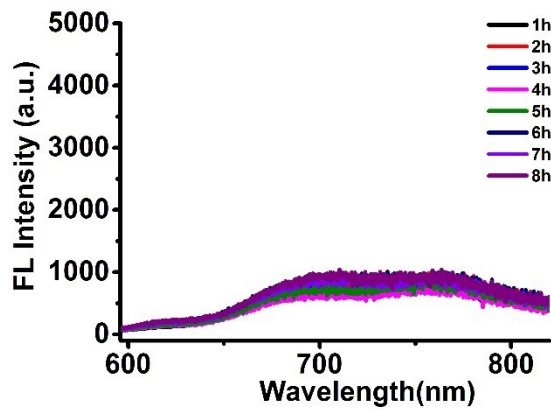

Figure S5. The emission spectrum of nanoprobe at room temperature. (10 mM PBS, pH = 7.4).

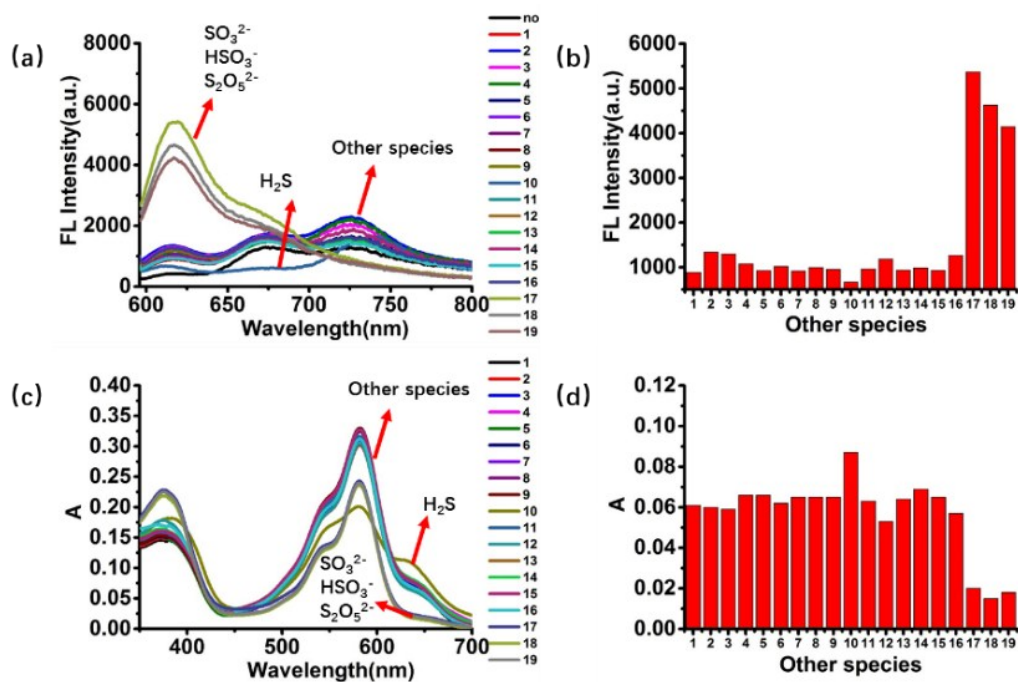

Fig. S6. (a) The emission spectrum of nanoprobe (5  $\mu$ M) in the presence of respective species (250  $\mu$ M) in PBS (10 mM PBS, PH = 7.4) within 60 min. (b). The emission spectrum at 615 nm of nanoprobe (5  $\mu$ M) in the presence of respective species (250  $\mu$ M) in PBS (10 mM PBS, PH = 7.4) within 60 min. (c).The absorption of nanoprobe (5  $\mu$ M) in the presence of respective species (250  $\mu$ M) in PBS (10 mM PBS, PH = 7.4, 37  $^{\circ}$ C) within 60 min. (d) The absorption in the channel of 650 nm. 1-19: 1-none, 2-GSH, 3-Hcy, 4-Cys, 5-KBr, 6-NaCl, 7-NH<sub>4</sub>Cl, 8-NaNO<sub>2</sub>, 9-Na<sub>2</sub>S<sub>2</sub>O<sub>3</sub>, 10-NaHS, 11-NaHSO<sub>4</sub>·H<sub>2</sub>O, 12-L-Asp, 13-L-Ala, 14-L-Leu, 15-Glu, 16-L-His, 17-Na<sub>2</sub>S<sub>2</sub>O<sub>5</sub>, 18-NaHSO<sub>3</sub>, 19-Na<sub>2</sub>SO<sub>3</sub>.

#### 4. Mechanism:

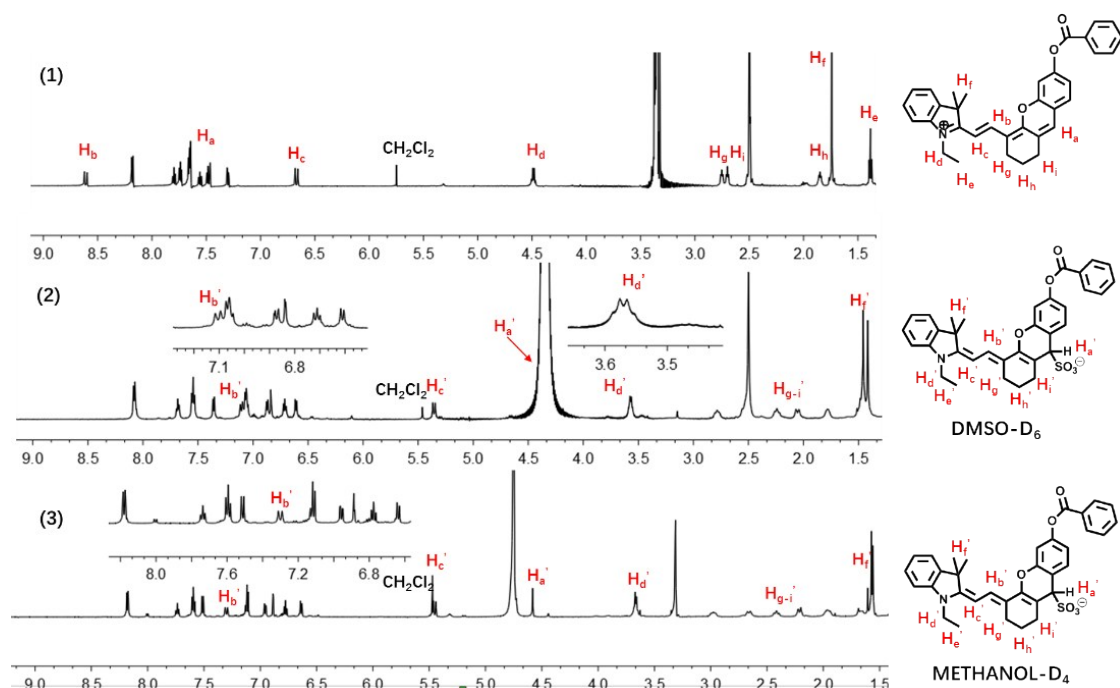

**Fig. S7.** (1)  $^1\text{H}$  NMR of HEM-CO-Ph ( $\text{DMSO-D}_6$ , 600 MHz). (2)  $^1\text{H}$  NMR of the HEM-CO-Ph- $\text{SO}_3$  ( $\text{DMSO-D}_6$ ;  $\text{D}_2\text{O} = 1:3$ , 600 MHz). The sulfite is excessive. (3)  $^1\text{H}$  NMR comparison of the adduct- $\text{SO}_3$  ( $\text{METHANOL-D}_4$ ;  $\text{D}_2\text{O} = 1:3$ , 600 MHz). The sulfite is 4 eq. excessive.

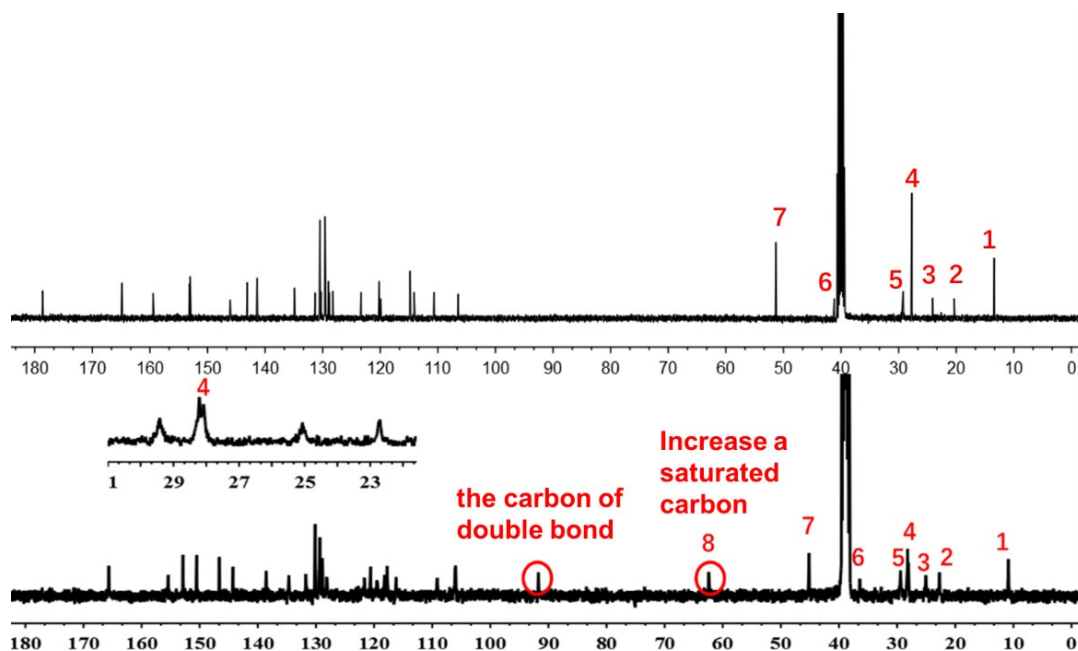

**Fig. S8.**  $^{13}\text{C}$  NMR comparison of acceptor HEM-CO-Ph and the HEM-CO-Ph- $\text{SO}_3$  ( $\text{DMSO-D}_6$ ;  $\text{D}_2\text{O} = 1:3$ , 600 MHz). The sulfite is 4 eq. excessive.

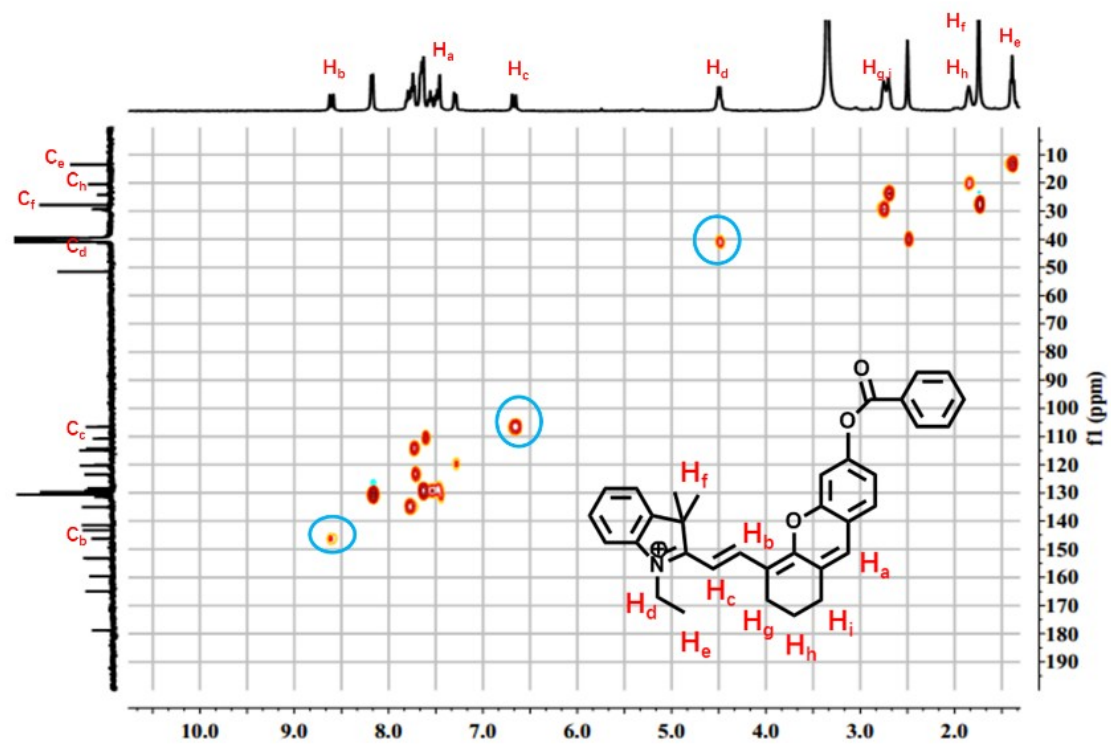

Fig. S9.  $^1\text{H}$ - $^{13}\text{C}$  HSQC spectrum of HEM-CO-Ph (DMSO- $\text{D}_6$ , 400MHz).

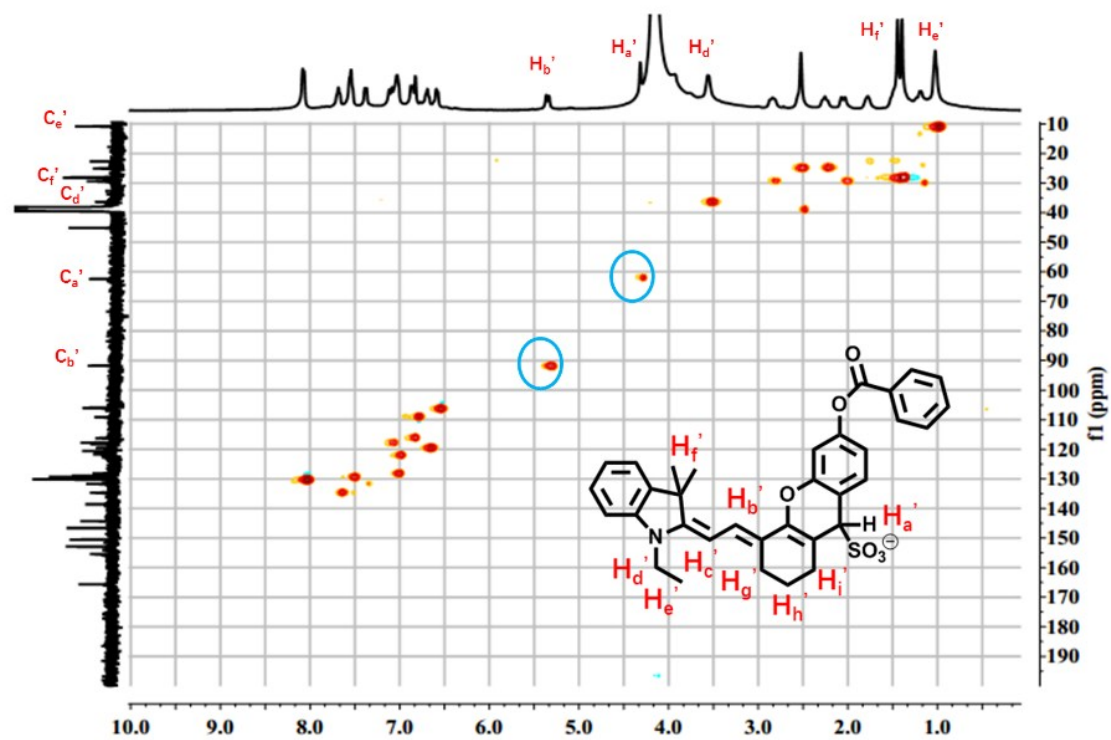

Fig. S10.  $^1\text{H}$ - $^{13}\text{C}$  HSQC spectrum of HEM-CO-Ph- $\text{SO}_3$  (DMSO- $\text{D}_6$ ;  $\text{D}_2\text{O} = 1:3$ , 400MHz). The sulfite is 4 eq. excessive.

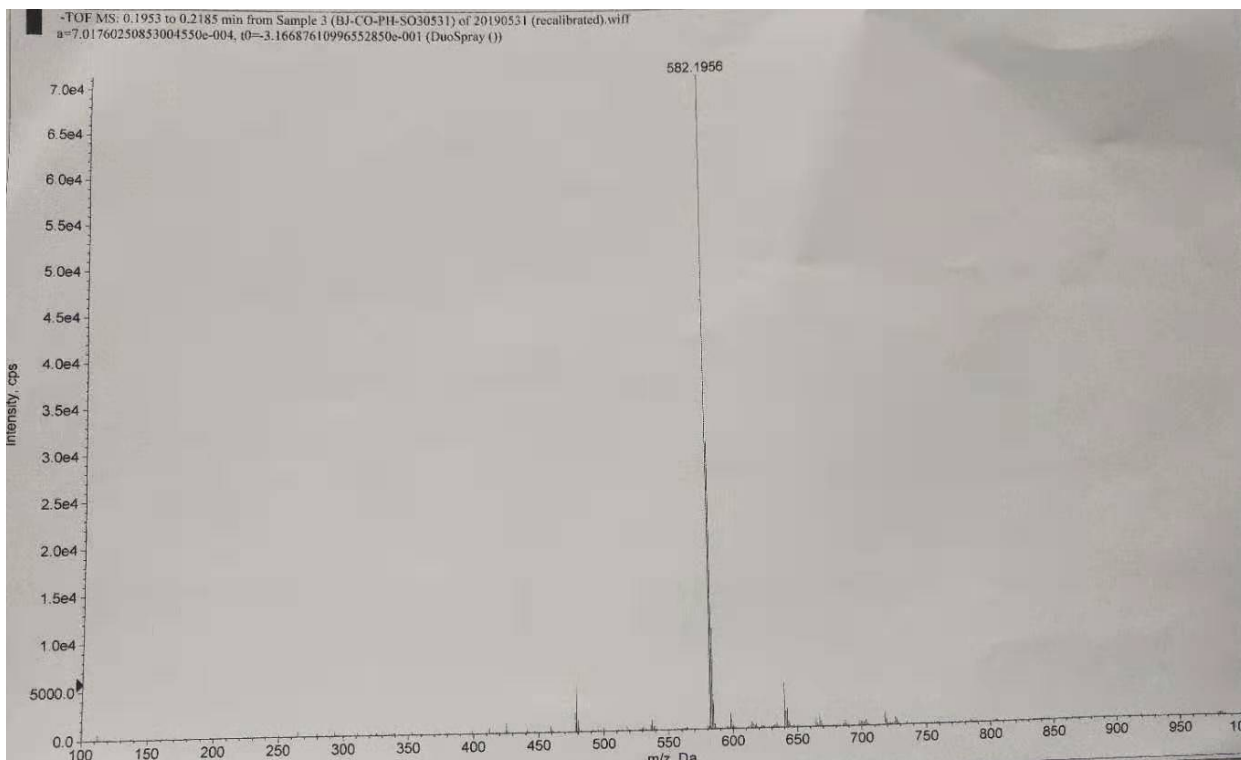

**Fig. S 11.** HR-Mass spectrum of the HEM-CO-Ph-SO<sub>3</sub>. MS (ESI): Found: m/z = 582.1956. (calculated for: 582.1956)

## 5. Cell Viability and Cellular Imaging

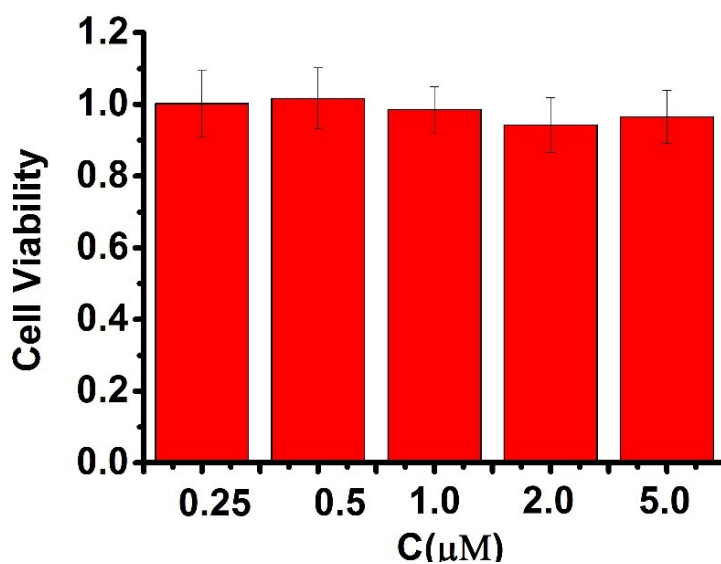

**Fig. S 12.** Cell viability by a standard CCK-8 assay. HepG-2 cells were incubated with different concentrations of nanoprobe for 12 h.

**5.1 Exogenous Imaging of Nanoprobe and Sulfite.** In the imaging experiments, the imaging divided into two groups, the first group was that cells were pre-treated with NEM (0.5 mM, 30 min), subsequently incubated

with probe (5  $\mu\text{M}$ , 30 min), and then imaged; the second group was that cells were pre-treated with NEM (0.5 mM, 30 min), subsequently incubated with  $\text{Na}_2\text{SO}_3$  (250  $\mu\text{M}$ , 30 min) and nanoprobe (5  $\mu\text{M}$ , 30 min), and then imaged. (red channel of 570-620 nm)

**5.2 Endogenous Imaging of Nanoprobe and Sulfite.** The first group is that cells were pre-treated with NEM (0.5 mM, 30 min), subsequently incubated with probe (5  $\mu\text{M}$ , 30 min), and then imaged; The second group is that cells were pre-treated with NEM (0.5 mM, 30 min), subsequently incubated with GSH (500  $\mu\text{M}$ , 30 min) and nanoprobe (5  $\mu\text{M}$ , 30 min), and then imaged. The third group is that cells were pre-treated with NEM (0.5 mM, 30 min), subsequently incubated with  $\text{Na}_2\text{S}_2\text{O}_3$  (250  $\mu\text{M}$ , 30 min) and nanoprobe (5  $\mu\text{M}$ , 30 min), and then imaged. The fourth group is that cells were pre-treated with NEM (0.5 mM, 30 min), subsequently incubated with GSH/  $\text{Na}_2\text{S}_2\text{O}_3$  (500  $\mu\text{M}$ /250  $\mu\text{M}$ , 30 min) and incubated with probe (5  $\mu\text{M}$ , 30 min), and then imaged. The fifth group is that cells were pre-treated with NEM (0.5 mM, 30 min), subsequently incubated with SNAP (60 min), then incubated GSH/  $\text{Na}_2\text{S}_2\text{O}_3$  (500  $\mu\text{M}$ /250  $\mu\text{M}$ , 30 min) and incubated with probe (5  $\mu\text{M}$ , 30 min), and then imaged. The sixth group is that cells were pre-treated with NEM (0.5 mM, 30 min), subsequently incubated with  $\text{SO}_3^{2-}$  (250  $\mu\text{M}$ , 30 min) and nanoprobe (5  $\mu\text{M}$ , 30 min), and then imaged.

**5.3 Subcellular Localization of the Nanoprobe.** The first group is that cells were only incubated with probe (5  $\mu\text{M}$ , 30 min), and then imaged; the second group is that cells were pre-treated with NEM (0.5 mM, 30 min), subsequently incubated with  $\text{Na}_2\text{SO}_3$  (250  $\mu\text{M}$ , 30 min) and nanoprobe (5  $\mu\text{M}$ , 30 min), and subsequently treated with commercially available mitochondrial dye, Mito-Tracker Green and common dye, Hoechst 33342 for a co-localization experiment and then imaged.

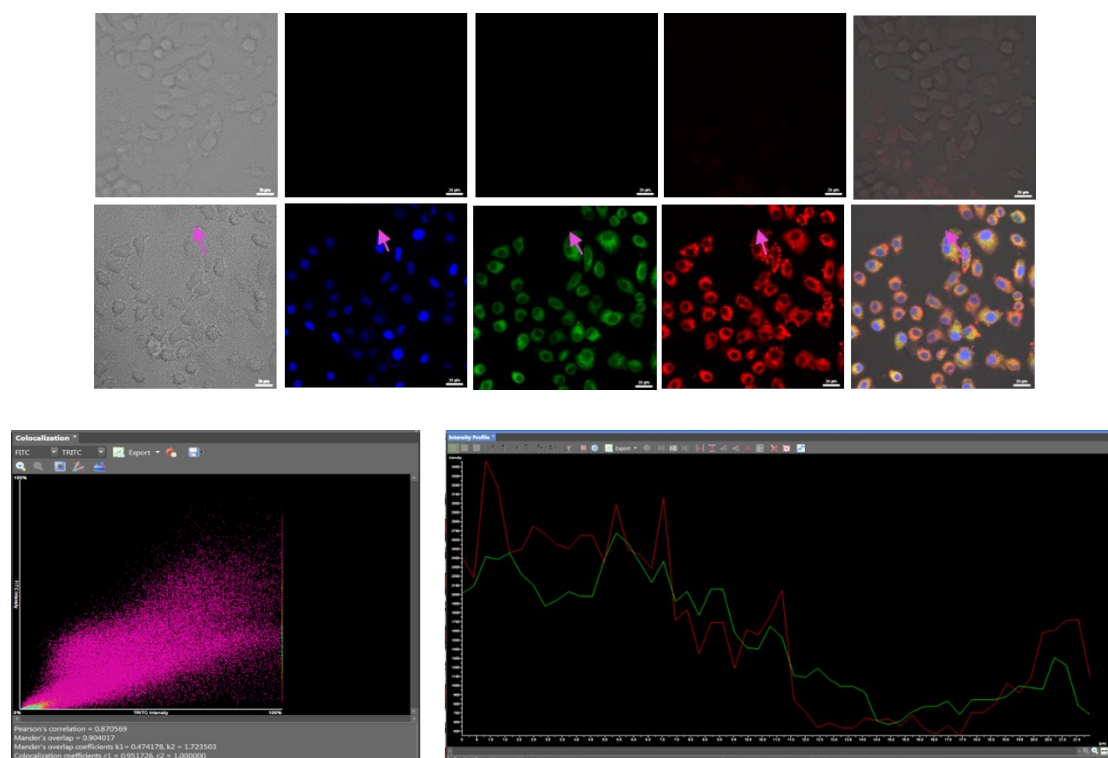

**Fig. S13.** The subcellular co-localization of the nanoprobe (5  $\mu\text{M}$ ) with commercially available mitochondrial dye.

## 6. Appendix Information

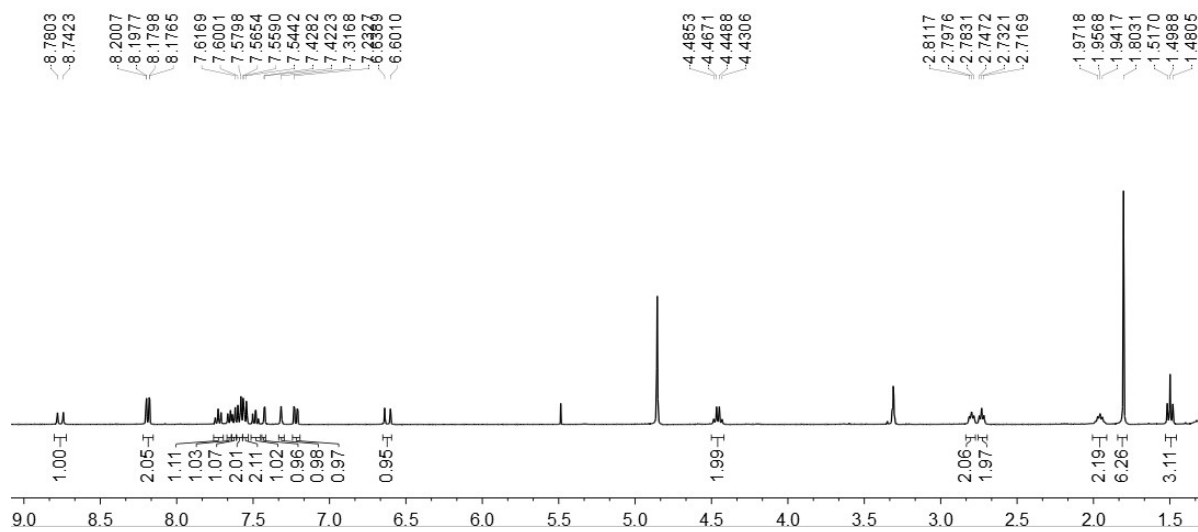

Fig. S14.  $^1\text{H}$  NMR spectrum of HEM-CO-Ph (methanol- $\text{D}_4$ , 400 MHz).

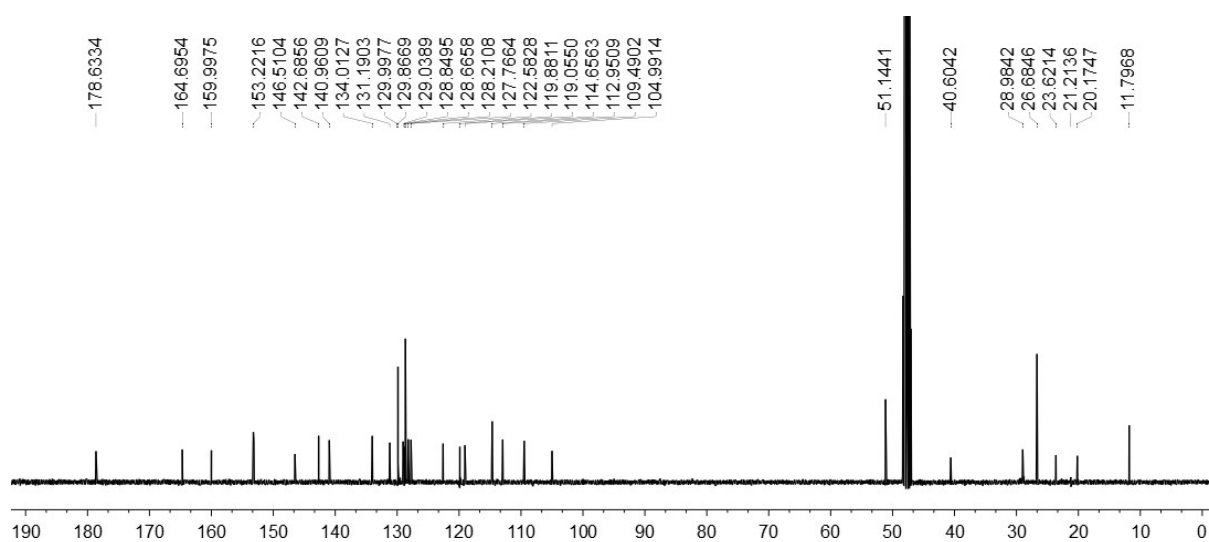

Fig. S15.  $^{13}\text{C}$  NMR spectrum of HEM-CO-Ph (methanol- $\text{D}_4$ , 400 MHz).



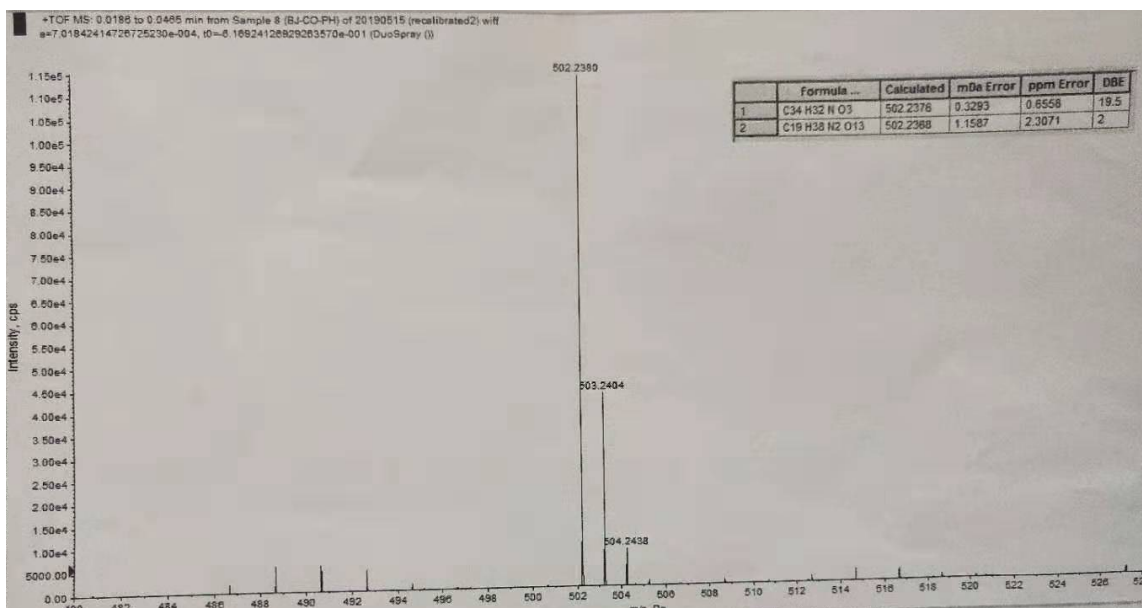

Fig. S16. HR-Mass spectrum of HEM-CO-Ph. MS (ESI):  $m/z = 502.2380$ .

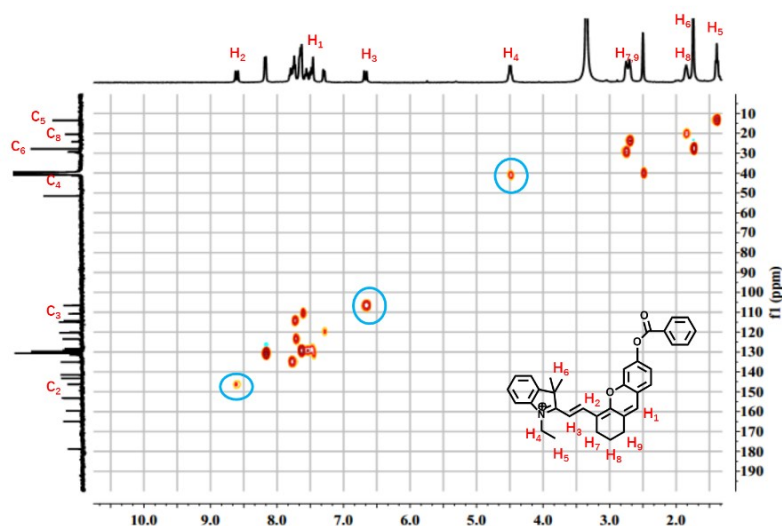

Fig. S17.  $^1\text{H}$ - $^{13}\text{C}$  HSQC spectrum of HEM-CO-Ph.

## Reference:

- (1) Mohr, G. J. *Chem. Commun.* 2002, 2646-2647.
- (2) Sun, Y.; Zhong, C.; Gong, R.; Mu, H.; Fu, E. *J Org Chem.* 2009, **74**, 7943-7946.
- (3) Choi, M.-G.; Hwang, J.-Y.; Eor, S.-Y.; Chang S.-K. *Org Lett.* 2010, **12**, 5624-5627.
- (4) Sun, Y. Q.; Wang, P.; Liu, J.; Zhang, J.; Guo, W. *Analyt.* 2012, **137**, 3430-3433.
- (5) Wu, M. Y.; He, T.; Li, K.; Wu, M. B.; Huang, Z.; Yu, X. Q. *Analyt.* 2013, **138**, 3018-3025.
- (6) Tian, H.; Qian, J.; Sun, Q.; Bai, H.; Zhang, W. *Anal Chim Acta.* 2013, **788**, 165-170.
- (7) Sun, Y. Q.; Liu, J.; Zhang, J.; Yang, T.; Guo, W. *Chem Commun.* 2013, **49**, 2637-2639.
- (8) Peng, M. J.; Yang, X. F.; Yin, B.; Guo, Y.; Suzenet, F.; En, D.; Li, J.; Li, C. W.; Duan, Y. W. *Chem Asian J.* 2014, **9**, 1817-1822.
- (9) Sun, M.; Yu, H.; Zhang, K.; Zhang, Y.; Yan, Y.; Huang, D.; Wang, S. *Anal Chem.* 2014, **86**, 9381-9385.

- (10) Wu, M. Y.; Li, K.; Li, C. Y.; Hou, J. T.; Yu, X. Q. *Chem Commun.* 2014, **50**, 183-185.
- (11) Liu, Z.; Guo, S.; Piao, J.; Zhou, X.; Wu, X. *RSC Adv.* 2014, **4**, 54554-54557.
- (12) Sun, Y.; Zhao, D.; Fan, S.; Duan, L.; Li, R. *J Agric Food Chem.* 2014, **62**, 3405-3409.
- (13) Xu, W.; Teoh, C. L.; Peng, J.; Su, D.; Yuan, L.; Chang, Y. T. *Biomaterials.* 2015, **56**, 1-9.
- (14) Zhu, L.; Xu, J.; Sun, Z.; Fu, B.; Qin, C.; Zeng, L.; Hu, X. *Chem Commun.* 2015, **51**, 1154-1156.
- (15) Liu, Y.; Li, K.; Wu, M. Y.; Liu, Y. H.; Xie, Y. M.; Yu, X. Q. *Chem Commun.* 2015, **51**, 10236-10239.
- (16) Zhu, X.; Zhu, L.; Liu, H. W.; Hu, X.; Peng, R. Z.; Zhang, J.; Zhang, X. B.; Tan, W. *Anal Chim Acta.* 2016, **937**, 136-142.
- (17) Zhang, Y.; Guan, L.; Yu, H.; Yan, Y.; Du, L.; Liu, Y.; Sun, M.; Huang, D.; Wang, S. *Anal Chem.* 2016, **88**, 4426-4431.
- (18) Xu, J.; Pan, J.; Jiang, X.; Qin, C.; Zeng, L.; Zhang, H.; Zhang, J. F. *Biosens Bioelectron.* 2016, **77**, 725-732.
- (19) Yang, X.; Zhou, Y.; Zhang, X.; Yang, S.; Chen, Y.; Guo, J.; Li, X.; Qing, Z.; Yang, R. *Chem Commun.* 2016, **52**, 10289-10292.
- (20) Liu, Y.; Li, K.; Xie, K. X.; Li, L. L.; Yu, K. K.; Wang, X.; Yu, X. Q. *Chem Commun.* 2016, **52**, 3430-3433.
- (21) Li, D. P.; Wang, Z. Y.; Cao, X. J.; Cui, J.; Wang, X.; Cui, H. Z.; Miao, J. Y.; Zhao, B. X. *Chem Commun.* 2016, **52**, 2760-2763.
- (22) Wang, Q.; Wang, W.; Li, S.; Jiang, J.; Li, D.; Feng, Y.; Sheng, H.; Meng, X.; Zhu, M.; Wang, X. *Dyes Pigm.* 2016, **134**, 297-305.
- (23) Li, H.; Yao, Q.; Fan, J.; Hu, C.; Xu, F.; Du, J.; Wang, J.; Peng, X. *Ind. Eng. Chem. Res.* 2016, **55**, 1477-1483.
- (24) Zhang, H.; Xue, S.; Feng, G. *Sens and Actuators B.* 2016, **231**, 752-758.
- (25) Chen, S.; Ma, C.; Yuan, M.-S.; Wang, W.; Wang, D.-E.; Chen, S.-W.; Wang, J. *RSC Adv.* 2016, **6**, 85529-85537.
- (26) Sun, Y.; Chen, Z.; Chen, F.; Liu, H.; He, H.; Zhang, X.; Wang, S. *J Fluoresc.* 2017, **27**, 1405-1411.
- (27) Yue, Y.; Huo, F.; Ning, P.; Zhang, Y.; Chao, J.; Meng, X.; Yin, C. *J Am Chem Soc.* 2017, **139**, 3181-3185.
- (28) Wang, Y.; Meng, Q.; Zhang, R.; Jia, H.; Wang, C.; Zhang, Z. *J. Lumin.* 2017, **192**, 297-302.
- (29) Dou, K.; Chen, G.; Yu, F.-B.; Sun, Z.-W.; Li, G.-L.; Zhao, X.-N.; C. L.-X.; Y, J.-M.; *J. Mater. Chem B.* 2017, **5**, 8389.
- (30) Wang, J.; Huang, Y.-D.; Tan, H.-Q.; Tao, J.; Qu, X.; Hua, J.-L. *J. Photochem. Photobiol., A.* 2017, **346**, 265-272.
- (31) Wang, Y.; Meng, Q.; Zhang, R.; Jia, H.; Zhang, X.; Zhang, Z. *Org Biomol Chem.* 2017, **15**, 2734-2739.
- (32) Chen, Z.; Chen, F.; Sun, Y.; Liu, H.; He, H.; Zhang, X.; Wang, S. *RSC Adv.* 2017, **7**, 2573-2577.
- (33) Gómez, M.; Perez, E. G.; Arancibia, V.; Iribarren, C.; Bravo-Díaz, C.; García-Beltrán, O.; Aliaga, M. E. *Sens and Actuators B.* 2017, **238**, 578-587.
- (34) Li, M.; Feng, W.; Zhang, H.; Feng, G. *Sens and Actuators B.* 2017, **243**, 51-58.
- (35) Tang, L.; He, P.; Yan, X.; Sun, J.; Zhong, K.; Hou, S.; Bian, Y. *Sens and Actuators B.* 2017, **247**, 421-427.
- (36) Zhang, L.-J.; Wang, Z.-Y.; Liu, J.-T.; Miao, J.-Y.; Zhao, B.-X. *Sens and Actuators B.* 2017, **253**, 19-26.
- (37) Zheng, X. L.; Li, H.; Feng, W.; Xia, H. C.; Song, Q. H. *ACS Omega.* 2018, **3**, 11831-11837.
- (38) Li, D.-P.; Han, X.-J.; Yan, Z.-Q.; Cui, Y.; Miao, J.-Y.; Zhao, B.-X. *Dyes Pigm.* 2018, **151**, 95-101.
- (39) Ye, Z.; Duan, C.; Sheng, R.; Xu, J.; Wang, H.; Zeng, L. *Talanta.* 2018, **176**, 389-396.
- (40) Li, H.; Zhou, X.; Fan, J.; Long, S.; Du, J.; Wang, J.; Peng, X. *Sens and Actuators B.* 2018, **254**, 709-718.
- (41) Li, J. Z.; Sun, Y. H.; Wang, C. Y.; Guo, Z. Q.; Shen, Y. J.; Zhu, W. H. *Anal Chem.* 2019, **91**, 11946-11951.
- (42) Ma, Y.; Tang, Y.; Zhao, Y.; Lin, W. *Anal Chem.* 2019, **91**, 10723-10730.
- (43) Tamima, U.; Santra, M.; Song, C. W.; Reo, Y. J.; Ahn, K. H. *Anal Chem.* 2019, **91**, 10779-10785.
- (44) Ma, Y.; Gao, W.; Zhu, L.; Zhao, Y.; Lin, W. *Chem Commun.* 2019, **55**, 11263-11266.
- (45) Xueli Yang, Y. Y., Tingting Zhou, Ming Jin, Xuequan Jing, Cai hong Miao; Li, W. *Journal. Photochem. Photobiol. A.* 2019, **372**, 212-217.

(46) Yin, G.; Gan, Y.; Yu, T.; Niu, T.; Yin, P.; Chen, H.; Zhang, Y.; Li, H.; Yao, S. *Talanta*. 2019, **191**, 428-434.
